# Supplementary material for: Fabrication of carbon-coated NiO supported on graphene for high performance supercapacitors
Source: Royal Society of Chemistry journal article supplement (doi:10.1039/c6ra01405d), 2016-01-01
Supplement: c6ra01405d1.pdf [file c6ra01405d1.pdf]

## Electronic Supplementary Information

Fabrication of carbon-coated NiO supported on graphene for high performance supercapacitors

*Lei Yu, Gengping Wan, Xiang Peng, Zhifeng Dou, Xinyue Li, Kan Wang, Shiwei Lin and Guizhen Wang\**

Key Laboratory of Tropical Biological Resources of Ministry of Education, Hainan University, Haikou 570228, China. E-mail: [wanguizhen0@hotmail.com](mailto:wanguizhen0@hotmail.com)

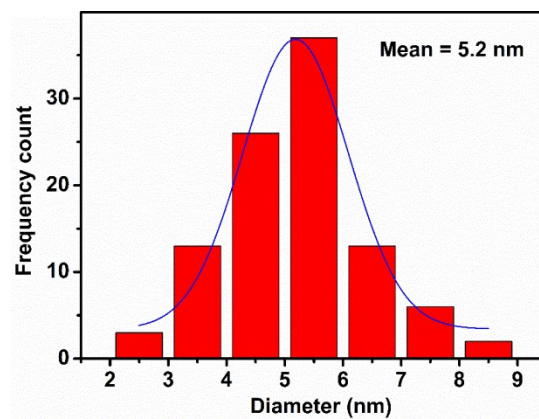

Fig. S1 The size distribution analysis of NiO nanoparticles.

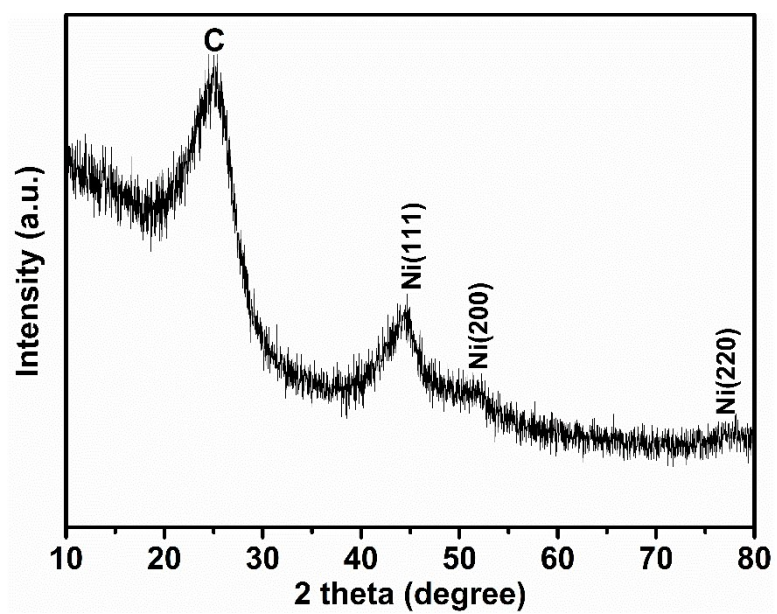

Fig. S2 XRD pattern of the sample obtained at 450 °C.

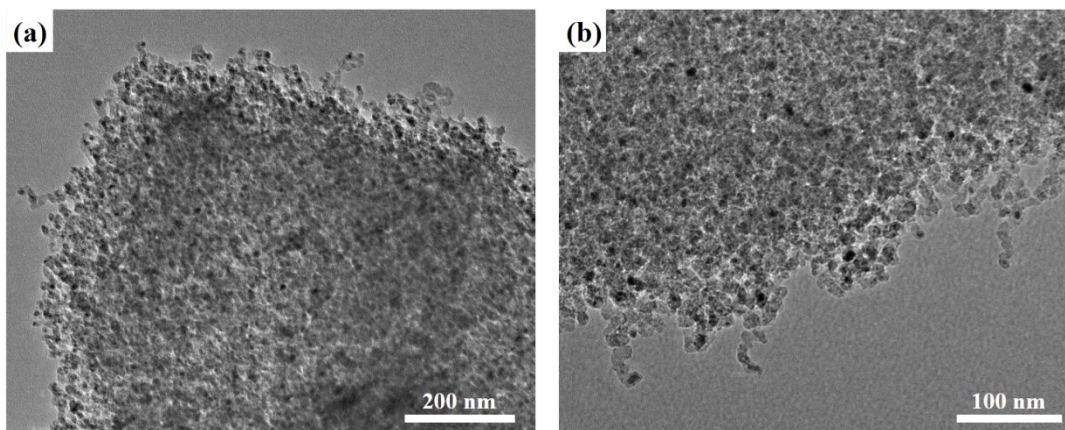

**Fig. S3** TEM images of the sample obtained at 450 °C.

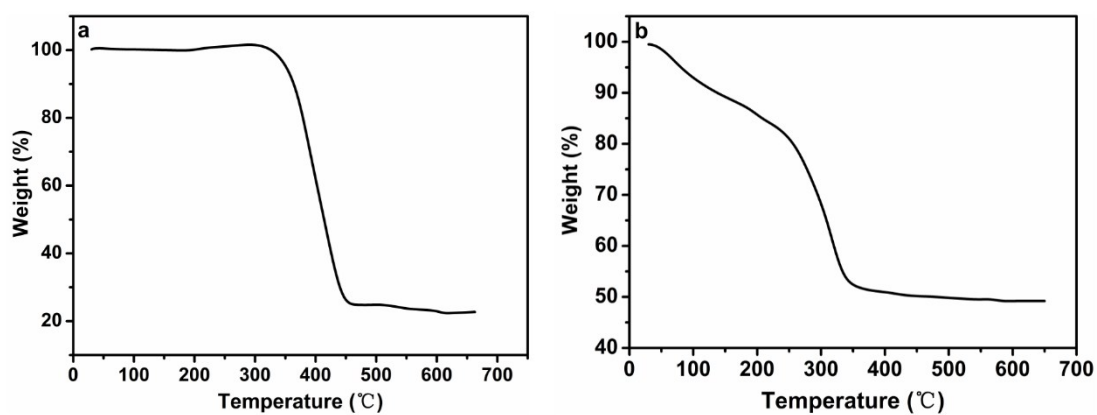

**Fig. S4** TGA spectra of (a) 400-NiO@C/graphene and (b) 400-NiO/graphene.

To find out how much NiO was contained in the composites, we did TGA measurements on 400-NiO@C/graphene and 400-NiO/graphene. The TGA were conducted under air atmosphere from room temperature to 650 °C (Fig. S4). The weight content of the NiO in the 400-NiO@C/graphene and 400-NiO/graphene examined by TGA are about 22.2% and 49.2%, respectively.

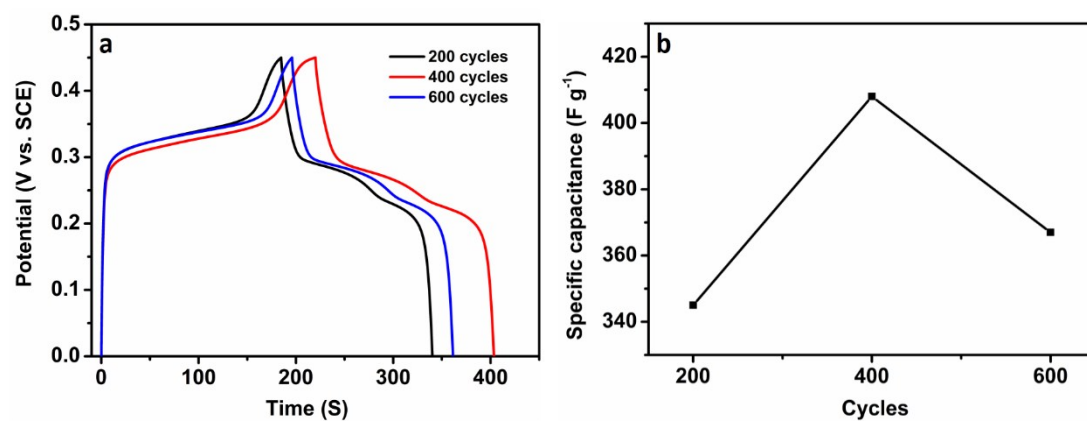

**Fig. S5** (a) Galvanostatic charge-discharge curves at  $1 A g^{-1}$  and (b) specific capacitance with different NiO cycles.
